# Supplementary material
Source: Springer Nature journal article supplement (https://www.springermedizin.de/resource/supplementary/12885_2008_1167_MOESM14_ESM.pdf/9471296)

Mock

Whole CS

| THAP     | -   | - | - | - | +   | + | + | + | -   | - | - | - | +   | + | + | + |
|----------|-----|---|---|---|-----|---|---|---|-----|---|---|---|-----|---|---|---|
| Time (h) | 0.5 | 1 | 2 | 4 | 0.5 | 1 | 2 | 4 | 0.5 | 1 | 2 | 4 | 0.5 | 1 | 2 | 4 |

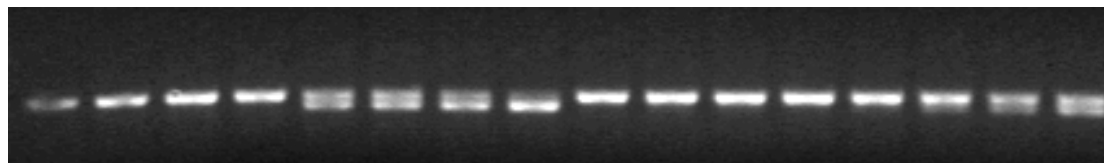

Vapor Phase

Tar Phase

| THAP     | -   | - | - | - | +   | + | + | + | -   | - | - | - | +   | + | + | + |
|----------|-----|---|---|---|-----|---|---|---|-----|---|---|---|-----|---|---|---|
| Time (h) | 0.5 | 1 | 2 | 4 | 0.5 | 1 | 2 | 4 | 0.5 | 1 | 2 | 4 | 0.5 | 1 | 2 | 4 |

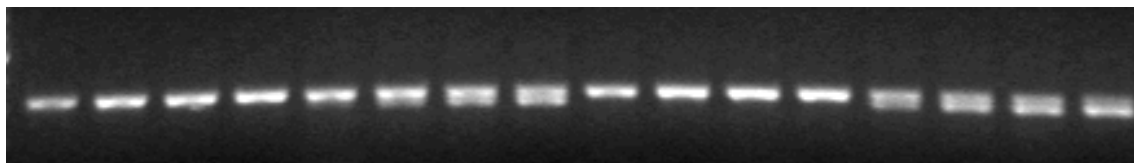

Supplement: MOESM14 [file 9471296]
